# Supplementary material for: A single-phase full-visible-spectrum phosphor for white light-emitting diodes with ultra-high color rendering
Source: Royal Society of Chemistry journal article supplement (doi:10.1039/d0dt03797d), 2020-01-01
Supplement: d0dt03797d1.pdf [file d0dt03797d1.pdf]

## Supplementary Information

### A Single-Phase Full-Visible-Spectra Phosphor for White Light-Emitting Diodes with Ultra-High Color Rendering

Xiangting Zhang,<sup>1</sup> Dan Zhang,<sup>1</sup> Zhibo Zheng,<sup>1</sup> Baofeng Zheng,<sup>1</sup> Yanhua Song,<sup>1\*</sup> Keyan Zheng,<sup>1</sup> Ye Sheng,<sup>1</sup> Zhan Shi,<sup>2</sup> and Haifeng Zou<sup>1\*</sup>

<sup>1</sup> College of Chemistry, Jilin University, Qianjin Street 2699, Changchun 130012, China.

<sup>2</sup> State Key Laboratory of Inorganic Synthesis and Preparative Chemistry, College of Chemistry, Jilin University, Qianjin Street 2699, Changchun 130012, China.

Corresponding Author

\*E-mail: yhsong@jlu.edu.cn (Y. Song).

\*E-mail: zouhf@jlu.edu.cn (H. Zou).

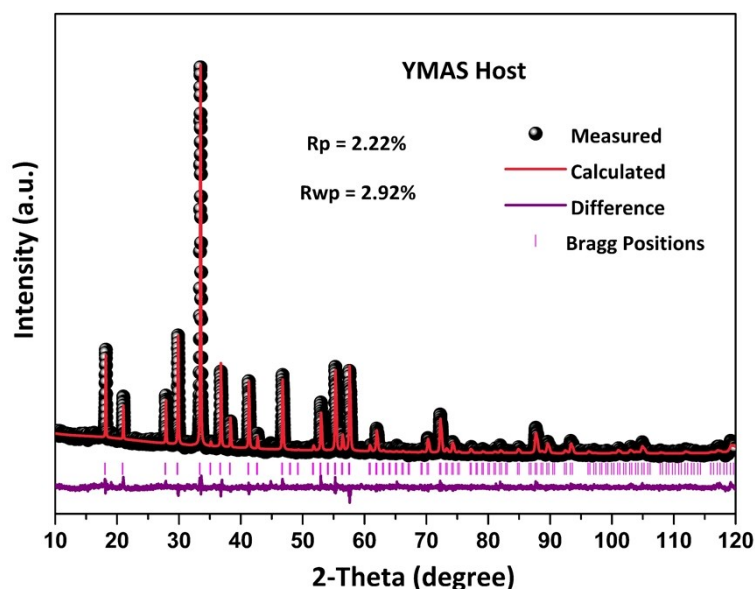

Figure S1. Rietveld refinement results of YMAS host.

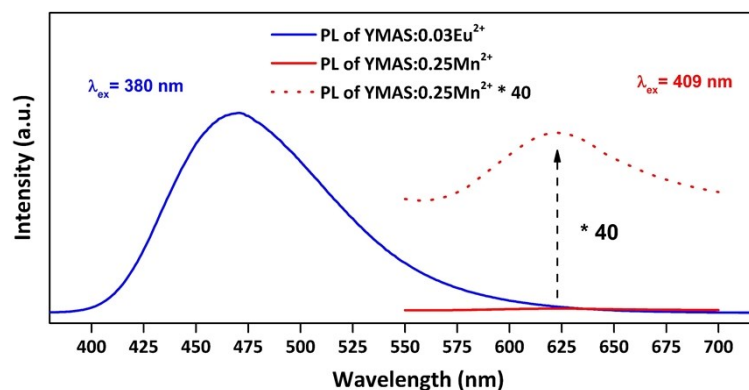

Figure S2. The luminescence intensity comparison of YMAS:0.03Eu<sup>2+</sup> and YMAS:0.25Mn<sup>2+</sup>

under the optimal excitation condition measured at room temperature.

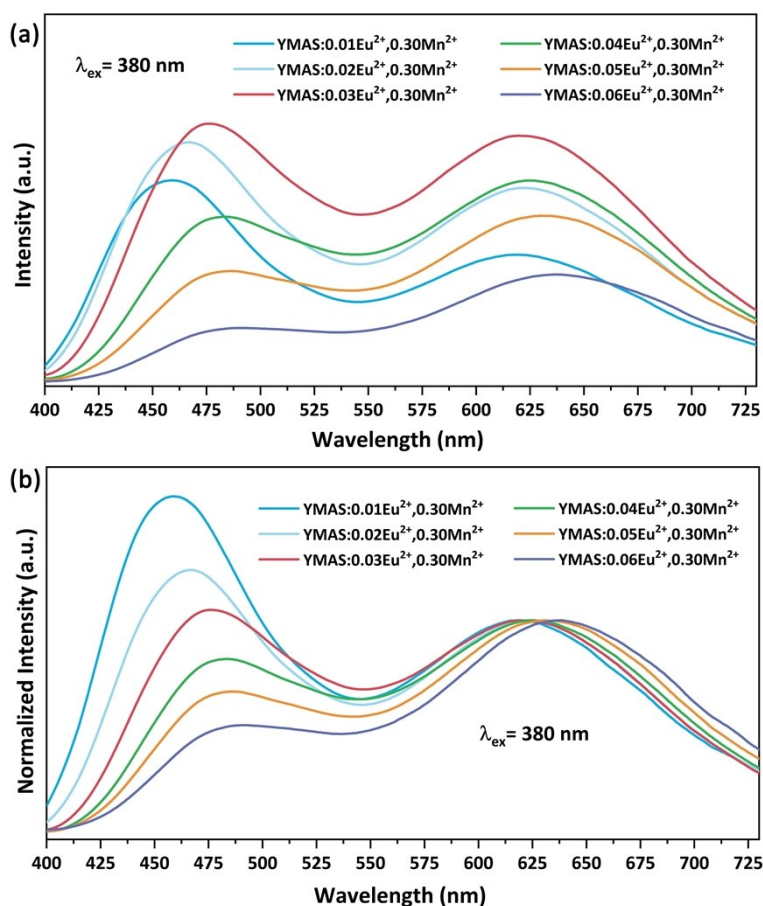

**Figure S3.** PL spectra (a) and normalized PL spectra (b) of YMAS: $x\text{Eu}^{2+}, 0.30\text{Mn}^{2+}$  ( $x = 0.01 - 0.06$ ) excited at 380 nm.

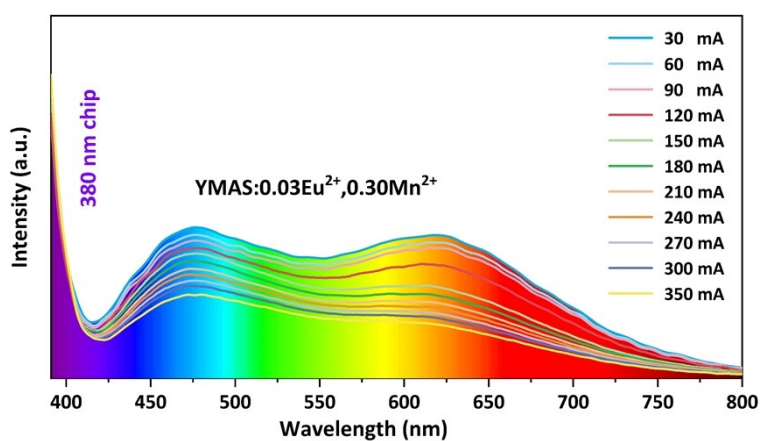

**Figure S4.** EL spectra of the YMAS: $0.03\text{Eu}^{2+}, 0.30\text{Mn}^{2+}$  phosphor-converted LED under various drive currents.

# Note: This LED device is not the one shown in Figure 9 in the manuscript.

**Table S1.** Photoelectric parameters of the YMAS:0.03Eu<sup>2+</sup>,0.30Mn<sup>2+</sup> phosphor-converted LED under various drive currents.

| <b>Current(mA)</b> | <b>CIE</b>       | <b>CCT</b> | <b>R<sub>a</sub></b> |
|--------------------|------------------|------------|----------------------|
| 30                 | (0.3427, 0.3443) | 5070       | 92.2                 |
| 60                 | (0.3344, 0.3408) | 5410       | 92.3                 |
| 90                 | (0.3283, 0.3388) | 5687       | 92.6                 |
| 120                | (0.3220, 0.3362) | 5989       | 92.8                 |
| 150                | (0.3185, 0.3353) | 6164       | 93.0                 |
| 180                | (0.3153, 0.3339) | 6334       | 93.4                 |
| 210                | (0.3129, 0.3332) | 6464       | 93.6                 |
| 240                | (0.3108, 0.3323) | 6581       | 93.9                 |
| 270                | (0.3092, 0.3322) | 6669       | 94.2                 |
| 300                | (0.3077, 0.3316) | 6755       | 94.4                 |
| 350                | (0.3059, 0.3312) | 6859       | 94.7                 |

# Note: This LED device is not the one shown in Figure 9 in the manuscript.
